# Supplementary material
Source: HighWire-hosted journal article supplement (https://bmjopen.bmj.com/content/7/11/e014998)
Supplement: inline-supplementary-material-1 [file inline-supplementary-material-1.pdf]

# روزمرہ کی بیماریاں، انکی علامات اور آپکار عمل

دن \_\_\_\_\_

(آپ کی آسانی کے لیے نمونے کے طور پر سوالنامے کی ایک کاپی مکمل کر کے ساتھ دی گئی ہے)

نام: \_\_\_\_\_  
تاریخ: \_\_\_\_\_  
وقت: \_\_\_\_\_

سوال نمبر 1- 1 سے 10 کے پیمانے پر جہاں 10 سے مراد بہت خوش ہے پچھلے 24 گھنٹوں میں آپ کتنا خوش رہے/رہیں ہیں۔

بالکل خوش نہیں ①—②—③—④—⑤—⑥—⑦—⑧—⑨—⑩ بہت خوش

سوال نمبر 2- 1 سے 10 کے پیمانے پر جہاں 10 سے مراد بہت اچھا ہے پچھلے 24 گھنٹوں میں جسمانی طور پر آپ نے کتنا اچھا محسوس کیا؟

بہت برا ①—②—③—④—⑤—⑥—⑦—⑧—⑨—⑩ بہت اچھا

سوال نمبر 3- پچھلے 24 گھنٹوں کے دوران کیا آپ نے کوئی بیماری یا اس کی علامت محسوس کی؟

○ ہاں (بقیہ سوالنامہ مکمل کریں)

○ نہیں (آج کے لیے بس یہیں تک کل اسی وقت نیا سوالنامہ مکمل کریں)

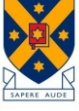

سوال نمبر 4۔ مندرجہ ذیل میں سے کوئی بیماریاں یا انکی علامات پچھلے 24 گھنٹوں میں آپ نے محسوس کیں؟  
اگر آپ کسی بیماری یا علامت کی وضاحت کرنا چاہیں تو سامنے دی گئی جگہ میں کر سکتے / سکتی ہیں

- |       |                               |       |                     |
|-------|-------------------------------|-------|---------------------|
| _____ | ○ نزلہ زکام -ii               | _____ | ○ کھانسی -i         |
| _____ | ○ کمر / گردن میں درد -iv      | _____ | ○ گلا خراب -iii     |
| _____ | ○ دانت میں درد -vi            | _____ | ○ سر درد -v         |
| _____ | ○ خراش -viii                  | _____ | ○ زخم -vii          |
| _____ | ○ ماہانہ ایام / حیض کا درد -x | _____ | ○ موج -ix           |
| _____ | ○ الٹی -xii                   | _____ | ○ پیٹ خراب -xi      |
| _____ | ○ بوکھلاہٹ -xiv               | _____ | ○ جلد پر خارش -xiii |
| _____ | ○ توانائی میں کمی -xvi        | _____ | ○ بخار -xv          |
| _____ | ○ کوئی اور -xviii             | _____ | ○ کوئی اور -xvii    |
|       |                               | _____ | ○ کوئی اور -xix     |

سوال نمبر 5۔ بیماری / بیماریوں کی علامت کب سے شروع ہوئیں؟

| کب سے شروع ہوئی |        |          |        |        |       |                     | بیماری / علامت |
|-----------------|--------|----------|--------|--------|-------|---------------------|----------------|
| معلوم نہیں      | آج شام | آج دوپہر | آج صبح | کل رات | کل دن | پرسوں یا اس سے پہلے |                |
|                 |        |          |        |        |       |                     |                |
|                 |        |          |        |        |       |                     |                |
|                 |        |          |        |        |       |                     |                |
|                 |        |          |        |        |       |                     |                |

سوالنمبر 6۔ آپ کے خیال میں بیماری کی وجہ کیا ہے آپ ایک سے زیادہ وجوہات بھی لکھ سکتے / سکتیں ہیں۔

| بیماری / علامت | وجہ / وجوہات |
|----------------|--------------|
|                |              |
|                |              |
|                |              |
|                |              |
|                |              |
|                |              |

سوالنمبر 7۔ بیماری کی شدت سے متعلق نیچے دیے گئے چارٹ کو مکمل کریں

| بیماری / علامت | شدت                   |                       |                       |                       |                       |                       |
|----------------|-----------------------|-----------------------|-----------------------|-----------------------|-----------------------|-----------------------|
|                | بہت شدید              |                       |                       |                       |                       | بالکل شدید نہیں       |
|                | <input type="radio"/> | <input type="radio"/> | <input type="radio"/> | <input type="radio"/> | <input type="radio"/> | <input type="radio"/> |
|                | <input type="radio"/> | <input type="radio"/> | <input type="radio"/> | <input type="radio"/> | <input type="radio"/> | <input type="radio"/> |
|                | <input type="radio"/> | <input type="radio"/> | <input type="radio"/> | <input type="radio"/> | <input type="radio"/> | <input type="radio"/> |
|                | <input type="radio"/> | <input type="radio"/> | <input type="radio"/> | <input type="radio"/> | <input type="radio"/> | <input type="radio"/> |
|                | <input type="radio"/> | <input type="radio"/> | <input type="radio"/> | <input type="radio"/> | <input type="radio"/> | <input type="radio"/> |

سوالنمبر 8۔ کیا آپ کی موجودہ بیماری / بیماریوں کی وجہ سے آپ کے روزمرہ کے معمولات میں کوئی تبدیلی آئی؟

ایک سے زیادہ پر بھی نشان لگا سکتے ہیں۔

i۔ آپ نے زیادہ وقت بستر میں گزارا ☐

ii۔ گھریلو کام کاج میں کمی کی ☐

iii۔ کام / نوکری سے وقفہ لیا ☐

iv۔ پڑھائی سے وقفہ لیا ☐

v۔ سماجی سرگرمیوں میں کمی کی ☐

vi۔ کوئی اور \_\_\_\_\_ ☐

vii۔ ☐ نہیں میرے معمولات میں کوئی تبدیلی نہیں آئی (سوالنمبر 9 کو چھوڑ کر سوالنمبر 10 پہ جائیے)

سوالنمبر 9۔ معمولات میں تبدیلی کا تعلق کس بیماری/بیماریوں یا علامت سے ہے؟

---



---

سوالنمبر 10۔ کیا آپ نے اپنی بیماری/بیماریوں یا انکی علامات کے بارے میں ذیل میں درج لوگوں سے کوئی بات چیت کی (ایک سے زیادہ پر بھی نشان لگا سکتے ہیں)

- i۔ شوہر/بیوی سے ☐
- ii۔ گھر کے کسی اور فرد سے ☐
- iii۔ رشتہ دار سے جو آپ کے ساتھ نہ رہتا/رہتی ہو ☐
- iv۔ دوست/ساتھ کام کرنے والے/پڑوسی سے ☐
- v۔ کسی اور سے ☐
- vi۔ نہیں میں نے بیماری سے متعلق کسی سے کوئی بات نہیں کی (سوالنمبر 11 کو چھوڑ کر سوالنمبر 12 پر جائیے)

سوالنمبر 11۔ کس بیماری سے متعلق آپ نے بات چیت کی؟

---



---

سوالنمبر 12۔ کیا آپ نے اپنی بیماری/بیماریوں یا انکی علامات کے علاج کے لیے کوئی گھریلو ٹوٹکا استعمال کیا؟

- ☐ نہیں (سوالنمبر 17 پہ جائیے)
- ☐ ہاں

سوالنمبر 13۔ آپ نے جو گھریلو ٹوٹکا استعمال کیا اس کی وضاحت کریں (اگر ایک سے زیادہ ٹوٹکے استعمال کیے تو تمام کی وضاحت کریں)۔

---



---

سوال نمبر 14۔ یہ گھریلو ٹوکا/ٹوٹکے کس بیماری/بیماریوں کے علاج کے لیے استعمال کیا/کیے؟

---

---

سوال نمبر 15۔ یہ گھریلو ٹوکا/ٹوٹکے استعمال کرنے کا مشورہ کس نے دیا؟

- i۔ ☐ شوہر/بیوی نے
- ii۔ ☐ گھر کے کسی اور فرد نے
- iii۔ ☐ رشتہ دار نے جو آپ کے ساتھ نہ رہتا/رہتی ہو
- iv۔ ☐ دوست/ساتھ کام کرنے والے/پڑوسی نے
- v۔ ☐ کسی اور نے \_\_\_\_\_
- vi۔ ☐ کسی نے مشورہ نہیں دیا، یہ میرا اپنا فیصلہ تھا

سوال نمبر 16۔ کیا آپ یہ گھریلو ٹوکا/ٹوٹکے پہلے استعمال کر چکے/چکی ہیں؟

- ☐ نہیں
- ☐ ہاں

سوال نمبر 17۔ کیا آپ نے اپنی بیماری/بیماریوں یا انکی علامات کے علاج کے لیے کوئی دوا استعمال کی؟

- ☐ نہیں (سوال نمبر 24 پر جائیے)
- ☐ ہاں

سوال نمبر 18۔ آپ نے جو دوا/ادویات استعمال کیں انکے نام لکھیں۔

---

---

سوال نمبر 19۔ یہ دوا/ادویات کس بیماری/بیماریوں کے علاج کے لیے استعمال کیں؟

---

---

سوال نمبر 20- آپ نے یہ دوا/ ادویات کہاں سے حاصل کیں؟

- i - ☐ گھر میں پہلے سے موجود تھیں
- ii - ☐ میڈیکل سٹور سے خریدیں (پچھلے 24 گھنٹوں کے دوران)
- iii - ☐ کسی اور دوکان سے خریدیں
- iv - ☐ شوہر/ بیوی نے دیں
- v - ☐ گھر کے کسی اور فرد نے دیں
- vi - ☐ رشتہ دار نے دیں جو آپ کے ساتھ نہیں رہتا/ رہتی
- vii - ☐ دوست/ ساتھ کام کرنے والے/ پڑوسی نے دیں
- viii - ☐ کسی اور نے دیں \_\_\_\_\_

سوال نمبر 21- کیا آپ نے میڈیکل سٹور والے سے اپنی بیماری/ بیماریوں کے متعلق مشورہ لیا؟ (اس سوال کا جواب صرف اس صورت میں دیں اگر آپ نے پچھلے 24 گھنٹوں کے دوران اپنی بیماری/ بیماریوں کے علاج کے لیے کوئی دوا میڈیکل سٹور سے خریدی ہو)

- ☐ نہیں
- ☐ ہاں

سوال نمبر 22- آپ کو یہ دوا/ استعمال کرنے کا مشورہ کس نے دیا؟

- i - ☐ میڈیکل سٹور والے نے
- ii - ☐ شوہر/ بیوی نے
- iii - ☐ گھر کے کسی اور فرد نے
- iv - ☐ رشتہ دار نے جو آپ کے ساتھ نہیں رہتا/ رہتی
- v - ☐ دوست/ ساتھ کام کرنے والے/ پڑوسی نے
- vi - ☐ کسی اور نے \_\_\_\_\_
- vii - ☐ کسی نے مشورہ نہیں دیا یہ میرا اپنا فیصلہ تھا

سوال نمبر 23- کیا آپ یہ دوا/ ادویات پہلے استعمال کر چکے/ چکی ہیں؟

- ☐ نہیں
- ☐ ہاں

سوالنمبر 24- کیا آپ نے اپنی بیماری/بیماریاں یا انکی علامات کے علاج کے لیے کچھ اور کیا؟

○ نہیں (سوالنمبر 27 پہ جائے)

○ ہاں (نیچے دی گئی جگہ پر تفصیل لکھیں کہ آپ نے کیا کیا)

سوالنمبر 25- آپ نے کس بیماری/بیماریوں یا علامات کے علاج کے لیے یہ کیا۔

سوالنمبر 26- کیا آپ یہ پہلے بھی کر چکے/چکی ہیں؟

○ نہیں ○ ہاں

سوالنمبر 27- کیا آپ نے اپنی بیماری/بیماریوں سے متعلق ذیل میں درج کسی بھی طبی ماہر سے مشورہ لینے کا سوچا؟

(ایک سے زیادہ ناموں پر بھی نشان لگا سکتے/سکتی ہیں سوال کا مقصد صرف یہ ہے کہ اپنے ایسا سوچا یا

نہیں سوال کا مقصد یہ ہرگز نہیں کہ آپ کسی طبی ماہر کے پاس گئے/گئیں یا نہیں)

i- ○ فریوٹھراپسٹ

ii- ○ ہومیو پیتھک ڈاکٹر

iii- ○ حکیم

iv- ○ ڈاکٹر

v- ○ ماہر ہڈی جوڑ توڑ/پہلوان

vi- ○ فارماسسٹ/کیمسٹ/میڈیکل سٹور والا

vii- ○ مولوی/روحانی پیشوا

viii- ○ دانتوں کا ڈاکٹر

ix- ○ کوئی اور \_\_\_\_\_

x- ○ نہیں میں نے کسی طبی ماہر سے مشورہ کرنے کا نہیں سوچا (سوالنمبر 29 پہ جائے)

سوالنمبر 28- طبی ماہر/ماہرین سے مشورہ کرنے کے بارے میں سوچنے کے وقت علاج پہ آنے والے اخراجات کی

کیا اہمیت تھی؟

بالکل اہم نہیں ○ ○ ○ ○ ○ ○ ○ بہت اہم

سوالنمبر 29- کیا آپ نے اپنی بیماری/بیماریوں سے متعلق ذیل میں درج کسی طبی ماہر سے مشورہ لیا؟

(ایک سے زیادہ ناموں پر بھی نشان لگا سکتے/سکتی ہیں)

- i ☐ فزیوتھراپسٹ
- ii ☐ ہومیوپیتھک ڈاکٹر
- iii ☐ حکیم
- iv ☐ ڈاکٹر
- v ☐ ماہر ہڈی جوڑ توڑ/پہلوان
- vi ☐ فارماسسٹ / کیمسٹ / میڈیکل سٹور والا
- vii ☐ مولوی / روحانی پیشوا
- viii ☐ دانتوں کا ڈاکٹر
- ix ☐ کوئی اور \_\_\_\_\_
- x ☐ نہیں میں نے کسی طبی ماہر سے مشورہ نہیں لیا (سوالنمبر 32 پہ جائیے)

سوالنمبر 30- آپ کو طبی ماہر/ماہرین سے ملنے کا مشورہ کسی نے دیا؟

- i ☐ شوہر/بیوی نے
- ii ☐ گھر کے کسی اور فرد نے
- iii ☐ رشتہ دار نے جو آپ کے ساتھ نہیں رہتا/رہتی
- iv ☐ دوست/ساتھ کام کرنے والے/پڑوسی نے
- v ☐ کسی اور نے \_\_\_\_\_
- vi ☐ کسی نے مشورہ نہیں دیا، یہ میرا اپنا فیصلہ تھا

سوالنمبر 31- کس بیماری/بیماریوں سے متعلق آپ نے طبی ماہر/ماہرین سے مشورہ کیا؟

---



---

سوالنمبر 32- پچھلے 24 گھنٹوں کے دوران اپنی بیماری/بیماریوں یا ان کی علامات کے علاج پر آپ

نے اندازاً کتنے روپے خرچ کیے؟

---



---
