# Supplementary material
Source: HighWire-hosted journal article supplement (https://bmjopen.bmj.com/content/7/11/e014998)
Supplement: inline-supplementary-material-2 [file inline-supplementary-material-2.pdf]

**Supplementary Table 1. Type of home remedies, medicine (self-medication) used and other actions for individual symptoms**

| Symptom        | Type of home remedy<br>(number of mentions)                                                                                                                                                              | Type of medicine<br>(number of mentions)                                                                                                                                                                            | Type of other action<br>(number of mentions)                                                                                                                          |
|----------------|----------------------------------------------------------------------------------------------------------------------------------------------------------------------------------------------------------|---------------------------------------------------------------------------------------------------------------------------------------------------------------------------------------------------------------------|-----------------------------------------------------------------------------------------------------------------------------------------------------------------------|
| Cough          | Tea, with or without milk (37)<br>Boiled egg (8)<br>Green tea (6)<br>Poppy legume tea (5)<br>Honey and black pepper (2)<br>Gargles with a solution of salt in water (2)<br>Stock of black chick peas (1) | Cough syrup (45)                                                                                                                                                                                                    | Herbal tea 'Joshanda®' (9)<br>Herbal cough syrup (8)<br>Lozenges (4)                                                                                                  |
| Sneezing       | Tea, with or without milk (14)<br>Green tea (3)<br>Ginger dessert (2)<br>Boiled egg (2)<br>Ginger tea (1)<br>Poppy legume tea (1)                                                                        | Nasal drops (4)<br>Antiallergic (20)                                                                                                                                                                                | Herbal tea 'Joshanda®' (14)<br>Homoeopathic medicine (1)<br>Steam (1)                                                                                                 |
| Sore throat    | Gargles with a solution of salt in water (42)<br>Tea, with our without milk (17)<br>Green tea (3)<br>Fluids (2)<br>Fennel tea (1)                                                                        | Paracetamol containing products (20)<br>Amoxicillin (14)<br>Levofloxacin (4)<br>Erythromycin (3)<br>Azithromycin (1)                                                                                                | Lozenges (18)<br>Herbal tea 'Joshanda®' (15)<br>Steam (3)<br>Homoeopathic medicine (1)<br>Avoiding dairy food (1)                                                     |
| Back/neck pain | Tea, with or without milk (12)<br>Mixture of milk, egg and turmeric (3)<br>Boiled egg (2)                                                                                                                | Paracetamol containing products (17)<br>Mefenamic acid containing products (14)<br>Ibuprofen containing products (13)<br>Diclofenac containing products (9)<br>Flurbiprofen (1)                                     | Massage, with or without oil (12)<br>Topical ointment (8)<br>Pressing (4)<br>Herbal ointment 3)<br>Rest (3)<br>Heat therapy (1)<br>Massage, with or without oil (2)   |
| Headache       | Tea (94)<br>Coffee (4)                                                                                                                                                                                   | Paracetamol containing products (101)<br>Aspirin (25)<br>Mefenamic acid containing products (20)<br>Ibuprofen containing products (8)<br>Propyphenazone (7)<br>Diclofenac containing products (5)<br>Alprazolam (3) | Pressing (28)<br>Massage with or without oil (3)<br>Covering head (2)<br>Homeopathic medicine (1)<br>Music (1)<br>Walk (1)<br>Vision testing (1)<br>Glucose drink (1) |

|                |                                                                                                                                                                                                  |                                                                                                                 |                                                                                                                              |
|----------------|--------------------------------------------------------------------------------------------------------------------------------------------------------------------------------------------------|-----------------------------------------------------------------------------------------------------------------|------------------------------------------------------------------------------------------------------------------------------|
|                |                                                                                                                                                                                                  | Orphenadrine (1)                                                                                                |                                                                                                                              |
| Toothache      | Clove (6)<br>Alum (1)                                                                                                                                                                            | Flurbiprofen (10)<br>Antibiotic (4)<br>Ampicillin 1)<br>Aspirin (1)                                             | Medicated toothpaste (6)<br>Mouthwash (5)                                                                                    |
| Cut            | None reported                                                                                                                                                                                    | Povidone iodine (3)<br>Antibacterial cream/ointment (3)                                                         | Bandage/plaster (7)<br>Applying spirit (2)<br>Applying lubricant oil (1)<br>Herbal ointment (1)<br>Applying Vaseline (1)     |
| Bruise         | None reported                                                                                                                                                                                    | None reported                                                                                                   | None reported                                                                                                                |
| Sprain         | Applying mixture of oil and turmeric (2)                                                                                                                                                         | Aspirin (1)<br>Mefenamic acid (1)                                                                               | Topical balm (6)<br>Herbal ointment (1)<br>Herbal medicine (1)<br>Massage, with or without oil (1)<br>Rest (1)               |
| Menstrual pain | Tea, with or without milk (11)<br>Warm milk (4)<br>Boiled egg (2)<br>Hot water and honey (1)<br>Cinnamon and mint tea (1)                                                                        | Paracetamol containing products (6)<br>Ibuprofen (1)<br>Diclofenac (10)<br>Orphenadrine (1)                     | Homeopathic medicine (2)<br>Heat therapy (1)<br>Rest (1)                                                                     |
| Diarrhoea      | Ispaghula (psyllium) husk (7)<br>Mint and <i>Ajwain</i> seeds (Carom or bishop weed; <i>Trachyspermum ammi</i> ) tea (3)<br>Bananas (3)<br>Green tea (3)<br>Green chilli seeds (2)<br>Fennel (1) | Metronidazole (15)<br>Activated attapulgit (4)<br>Hyoscine butylbromide (3)<br>Loperamide (2)<br>Omeprazole (2) | Herbal mixture (4)<br>Homeopathic medicine (2)<br>Electrolyte replacement (2)<br>Herbal gripe water (1)<br>Skipping meal (1) |
| Vomiting       | Lemon drink (2)<br>Green tea (1)<br>Carbonated drink (1)                                                                                                                                         | Dimenhydrinate (1)<br>Domperidone (1)<br>Dotaverinum (1)                                                        | Herbal gripe water (1)<br>Homeopathic medicine (1)                                                                           |
| Skin rash      | None reported                                                                                                                                                                                    | Antiallergic (3)                                                                                                | Mineral mask (1)<br>Oil massage (1)<br>Bath (1)                                                                              |
| Nervousness    | None reported                                                                                                                                                                                    | None reported                                                                                                   | Prayers/recitation (1)<br>Rest (1)<br>Watching television (1)                                                                |
| Fever          | Tea, with or without milk (22)<br>Warm milk (2)<br>Stock (2)<br>Coffee (1)                                                                                                                       | Paracetamol containing products (63)<br>Mefenamic acid containing products (10)                                 | Herbal tea ' <i>Joshanda</i> ' (3)<br>Rest (2)<br>Cold water bandages (1)                                                    |

---

|            |                                                                                                |                                   |                                                                                                                          |
|------------|------------------------------------------------------------------------------------------------|-----------------------------------|--------------------------------------------------------------------------------------------------------------------------|
|            |                                                                                                | Ibuprofen containing products (3) |                                                                                                                          |
| Low energy | Fruit, fruit drink and juice (14)<br>Milk (9)<br>Tea (9)<br>Egg (3)<br>Taking proper meals (2) | Calcium containing products (3)   | Multivitamins (8)<br>Energy drink (3)<br>Massage, with or without oil (2)<br>Glucose drink (1)<br>Prayers/recitation (1) |
| Allergy    | Gargles with a solution of salt in water (11)<br>Tea (1)                                       | Antiallergic (12)                 | Herbal tea ' <i>Joshanda</i> <sup>®</sup> ' (1)<br>Lozenges (1)<br>Multivitamins (1)                                     |

---
